# Supplementary material for: Exploring the Use of Traditional Medicines, Natural Health Products and Conventional Medicines: Development and Testing of the New Zealand ‘All-Medicines’ Questionnaire
Source: PubMed Central journal article supplement — Drugs Real World Outcomes. 2023 Nov 7;11(1):13–32. doi: 10.1007/s40801-023-00389-9 (PMC10928020; doi:10.1007/s40801-023-00389-9), 2023-11-07
Supplement: 40801_2023_389_MOESM2_ESM.pdf [file 40801_2023_389_MOESM2_ESM.pdf]

Online Resource 2: Probing questions in the web-based questionnaire

Did you have problems understanding any of these questions?

- No. All questions were **CLEAR**
- Yes. There were questions that were **A BIT UNCLEAR**
  - Please describe the problem(s)  
\_\_\_\_\_
- Yes. There were questions that were **VERY UNCLEAR**
  - Please describe the problem(s)  
\_\_\_\_\_

Did you have problems answering any of these questions?

- Yes.
  - Please describe the problem(s)  
\_\_\_\_\_
- No

Did you have problems remembering the cost of the product(s)/preparation(s)?

- Yes
  - Please describe the problem(s): \_\_\_\_\_
- No

Did you have problems remembering the practitioners you have consulted in the previous 12 months?

- Yes
  - Please describe the problem(s): \_\_\_\_\_
- No
